# Supplementary material
Source: MDPI journal article supplement (https://www.mdpi.com/search?q=molbank-2018-M1018)
Supplement: s002 [file molbank-2018-M1018-s002.mol]

molbank-352563-structure.mol
  ChemDraw08211812322D

 21 23  0  0  0  0  0  0  0  0999 V2000
    0.3820    0.3012    0.0000 C   0  0  0  0  0  0  0  0  0  0  0  0
    0.3890   -0.5238    0.0000 N   0  0  0  0  0  0  0  0  0  0  0  0
    1.1757   -0.7721    0.0000 C   0  0  0  0  0  0  0  0  0  0  0  0
    1.6550   -0.1006    0.0000 C   0  0  0  0  0  0  0  0  0  0  0  0
    1.1645    0.5627    0.0000 N   0  0  0  0  0  0  0  0  0  0  0  0
   -0.3359    0.7076    0.0000 N   0  0  0  0  0  0  0  0  0  0  0  0
    1.4128    1.3495    0.0000 N   0  0  0  0  0  0  0  0  0  0  0  0
   -0.3220   -0.9423    0.0000 S   0  0  0  0  0  0  0  0  0  0  0  0
   -1.0399   -0.5358    0.0000 N   0  0  0  0  0  0  0  0  0  0  0  0
   -1.0468    0.2891    0.0000 C   0  0  0  0  0  0  0  0  0  0  0  0
    0.0965   -1.6533    0.0000 O   0  0  0  0  0  0  0  0  0  0  0  0
   -0.7284   -1.6602    0.0000 O   0  0  0  0  0  0  0  0  0  0  0  0
    1.5176   -1.5229    0.0000 C   0  0  0  0  0  0  0  0  0  0  0  0
    2.3388   -1.6022    0.0000 C   0  0  0  0  0  0  0  0  0  0  0  0
    2.8181   -0.9307    0.0000 C   0  0  0  0  0  0  0  0  0  0  0  0
    2.4762   -0.1799    0.0000 C   0  0  0  0  0  0  0  0  0  0  0  0
   -1.7648    0.6956    0.0000 N   0  0  0  0  0  0  0  0  0  0  0  0
   -2.8181   -0.2690    0.0000 C   0  0  0  0  0  0  0  0  0  0  0  0
   -2.5699    0.5174    0.0000 C   0  0  0  0  0  0  0  0  0  0  0  0
   -0.7114    1.6602    0.0000 C   0  0  0  0  0  0  0  0  0  0  0  0
   -1.5166    1.4820    0.0000 C   0  0  0  0  0  0  0  0  0  0  0  0
 20 21  1  0      
 18 19  1  0      
 17 19  1  0      
 17 21  1  0      
 10 17  1  0      
  1  2  1  0      
  2  3  1  0      
  3  4  2  0      
  4  5  1  0      
  1  5  1  0      
  1  6  2  0      
  5  7  1  0      
  8  9  1  0      
  9 10  2  0      
  8 11  2  0      
  8 12  2  0      
  8  2  1  0      
 10  6  1  0      
  3 13  1  0      
 13 14  2  0      
 14 15  1  0      
 15 16  2  0      
 16  4  1  0      
M  STY  1   1 SUP
M  SLB  1   1   1
M  SAL   1  5  17  18  19  20  21
M  SBL   1  1   5
M  SMT   1 ^NEt2
M  SBV   1   5    0.7179   -0.4065
M  END
